# Supplementary material for: Microbiome-derived metabolite effects on intestinal barrier integrity and immune cell response to infection
Source: PubMed Central journal article supplement (PMC11469068; doi:10.1099/mic.0.001504), 2024-10-11
Supplement: mic-170-01504-s001.pdf [file mic-170-01504-s001.pdf]

1  
2  
3  
4  
5  
6  
7  
8  
9  
10  
11  
12  
13  
14  
15  
16  
17  
18  
19  
20  
21  
22  
23  
24  
25  
26  
27  
28  
29  
30  
31  
32  
33  
34

Title: Microbiome-derived metabolite effects on intestinal barrier integrity and immune cell response to infection

Authors: Lauren Adams<sup>1</sup>, Xiang Li<sup>1</sup>, Richard Burchmore<sup>1</sup>, Richard Goodwin<sup>1,2</sup>, Daniel M. Wall<sup>1</sup>

<sup>1</sup>School of Infection and Immunology, College of Medical, Veterinary and Life Sciences, Sir Graeme Davies Building, University of Glasgow, Glasgow G12 8TA, United Kingdom.

<sup>2</sup>Imaging and Data Analytics, Clinical Pharmacology and Safety Sciences, Biopharmaceuticals R&D, AstraZeneca, Cambridge CB4 0WG, U.K.

*Corresponding author email address: [Donal.Wall@glasgow.ac.uk](mailto:Donal.Wall@glasgow.ac.uk);*

## **Supplementary Materials**

35

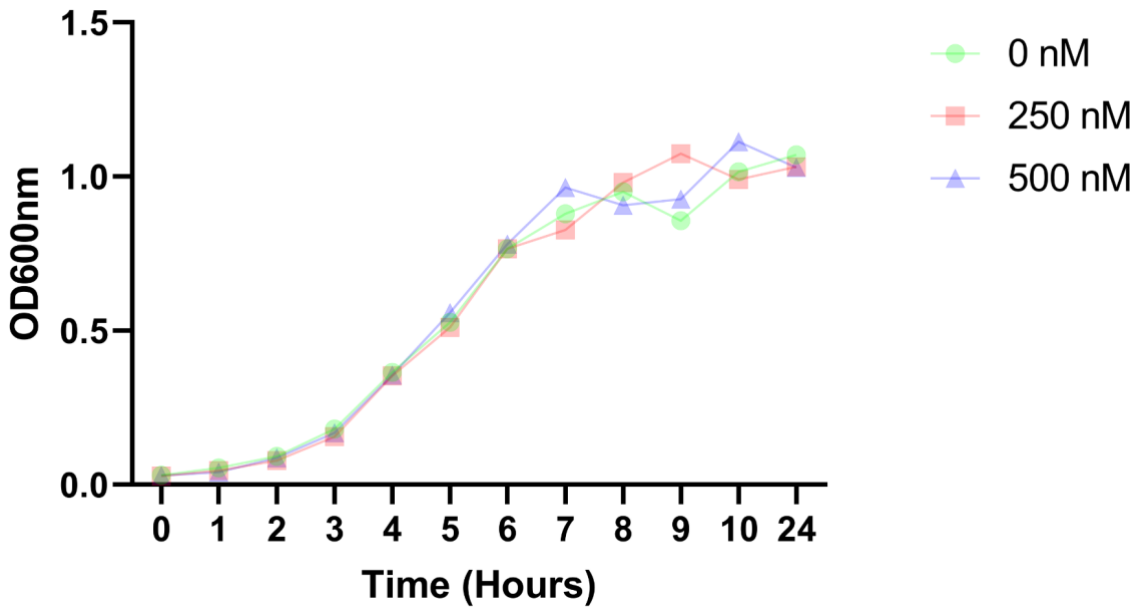

36

37 **Figure S1. Growth curve of *E. coli* LF82 in GCA supplemented media.** Bacteria  
38 were cultured in LB and supplemented with 0, 250 or 500 nM GCA and grown at  
39 37°C in a shaken incubator. Results shown as mean of three biological replicates.  
40 Two-way ANOVA did not show any significant changes in growth between control  
41 condition (0 nM) and the two GCA supplemented conditions.

42

43

44

45

46

47

48

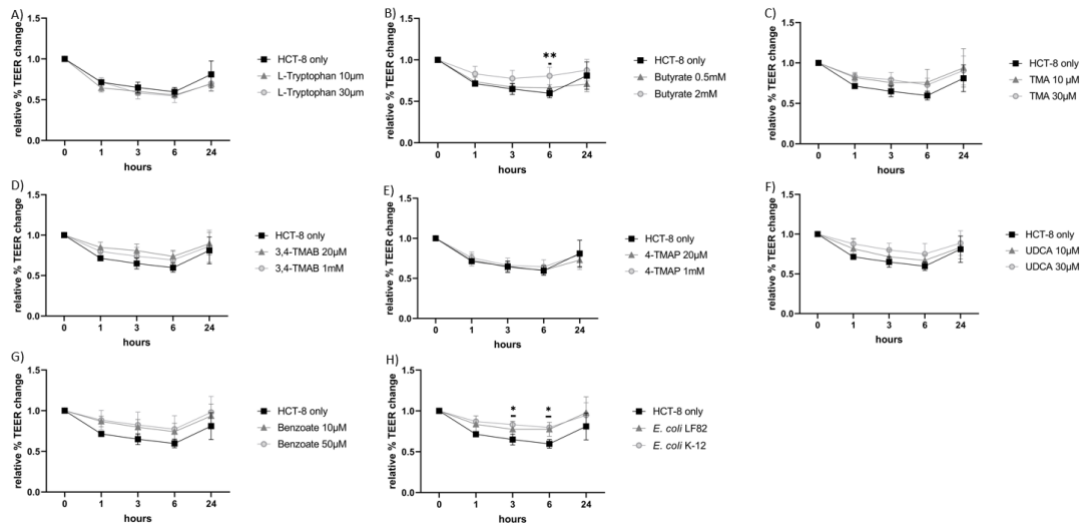

49

50 **Figure S2. TEER as a model for HCT-8 barrier function in response to**  
 51 **metabolites.** HCT-8 cell monolayers were treated with indicated metabolites or  
 52 control supernatants from *E. coli* LF82 and *E. coli* K-12. TEER was measured over a  
 53 24 h period and results are shown as a relative percentage change compared to  
 54 control (0 h TEER reading). Data shown is the mean of three biological replicates  $\pm$   
 55 standard deviation (SD) (error bars). Two-way ANOVA was performed to test  
 56 significance between untreated and monolayers treated with different molecule  
 57 concentrations at each time point. \*  $p < 0.05$ , \*\*  $p < 0.01$ , \*\*\*  $p < 0.001$ , \*\*\*\*  $p < 0.0001$  was  
 58 considered statistically significant.

59

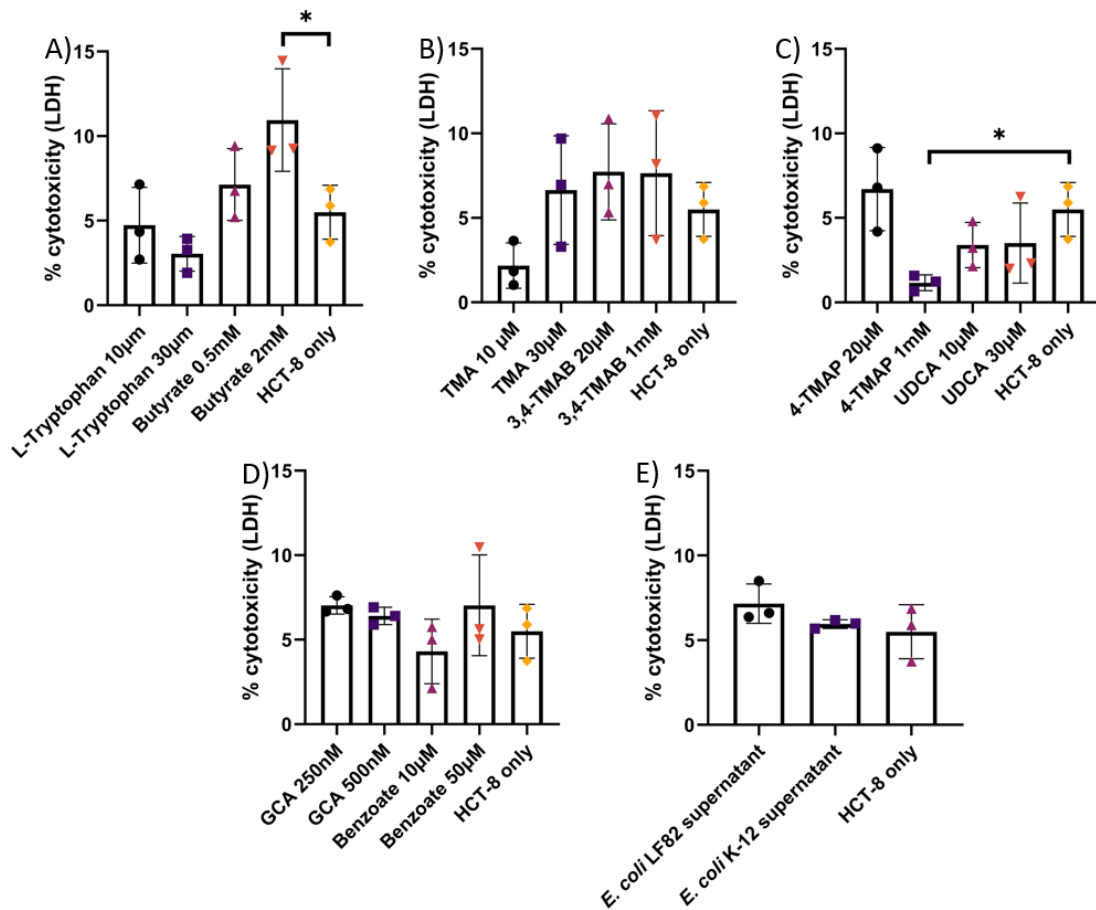

60

61 **Figure S3. LDH release from HCT-8 cells as an indicator of metabolite**

62 **cytotoxicity.** (A-E) HCT-8 cells were exposed to metabolites and the supernatants

63 from *E. coli* LF82 and K-12 for 24 h. HCT-8 cells only and cells treated with 2% triton-

64 x were used as low and high LDH release controls, respectively. The percentage of

65 cytotoxicity was calculated as  $\% = [(measured\ absorbance\ of\ sample - low\ control) / (high$

66  $control - low\ control)] \times 100$ . Data are shown as the mean of three biological replicates

67  $\pm$  standard deviation (SD) (error bars). One-way ANOVA was performed across all

68 metabolites and \* $p < 0.05$ , \*\* $p < 0.01$ , \*\*\* $p < 0.001$ , \*\*\*\* $p < 0.0001$  versus the control

69 condition (cells without molecules) was considered statistically significant.

70

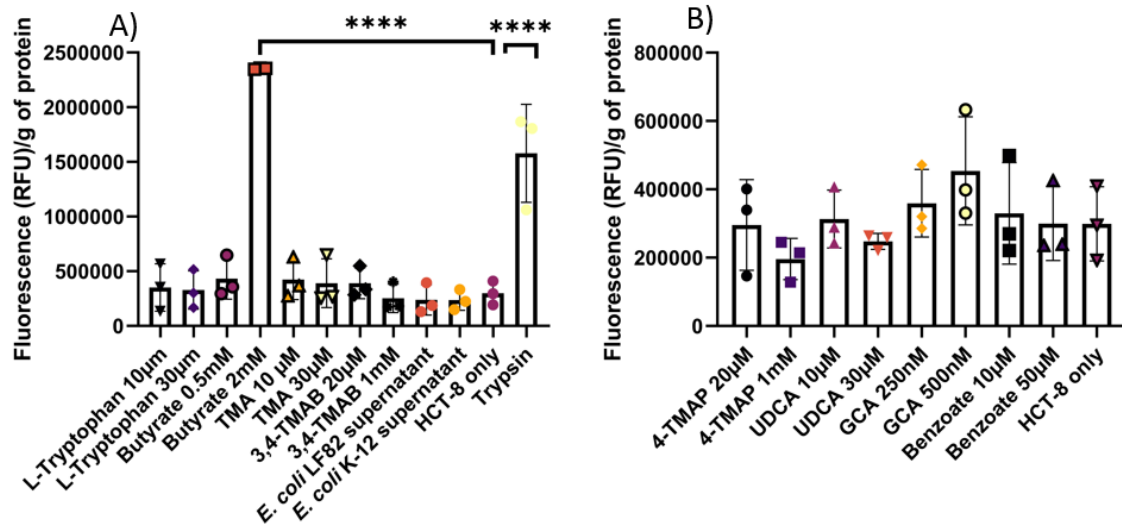

71

72 **Figure S4. Caspase-3/7 activation in metabolite-treated HCT-8 cells.** HCT-8 cells

73 were treated with metabolites and supernatants from *E. coli* LF82 and K-12. Relative

74 fluorescence units (RFU) were normalised to per gram of protein in the cell lysate.

75 Data are shown as the mean of three biological replicates  $\pm$  standard deviation (SD)

76 (error bars). One-way ANOVA was performed across all metabolites and  $*p < 0.05$ ,

77  $**p < 0.01$ ,  $***p < 0.001$ ,  $****p < 0.0001$  versus the control condition (cells without

78 molecules) was considered statistically significant.

79

80

81

82

83

84

85

86

87

88

89

90

91

92

93

94

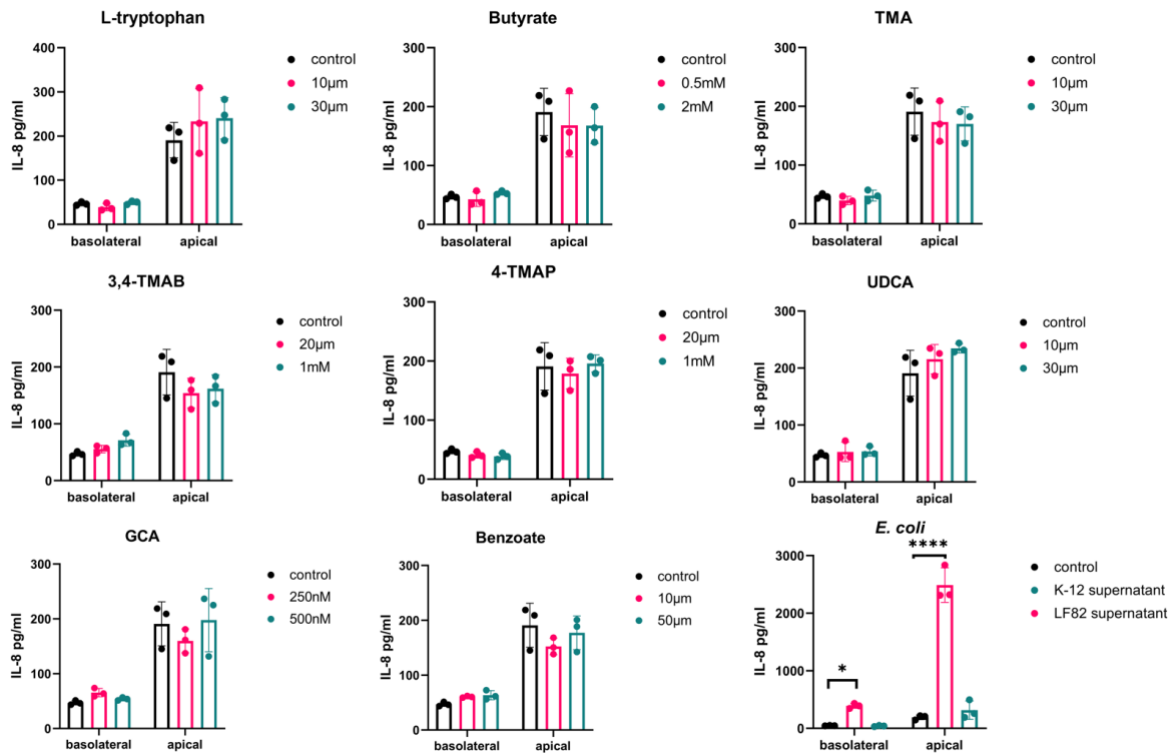

95

96 **Figure S5. IL-8 release into apical and basolateral epithelial compartments.**

97 Apical treatment of HCT-8 monolayers was carried out with named metabolites or  
 98 bacterial supernatants as controls. After 24 h supernatants were collected from the  
 99 apical and basolateral epithelial compartments and IL-8 quantified. The data is  
 100 shown as the mean of 3 biological replicates  $\pm$  standard deviation (SD) (error bars).  
 101 Two-way ANOVA was performed for each molecule versus the control condition  
 102 (cells without treatment). \* $p < 0.05$ , \*\* $p < 0.01$ , \*\*\* $p < 0.001$ , \*\*\*\* $p < 0.0001$  was  
 103 considered statistically significant.

104

105

106
